# Supplementary material for: The pseudoenzyme ADPRHL1 affects cardiac function by regulating the ROCK pathway
Source: PubMed Central journal article supplement (PMC10601310; doi:10.1186/s13287-023-03507-0), 2023-10-26

# Supplementary figure 1

**A.**

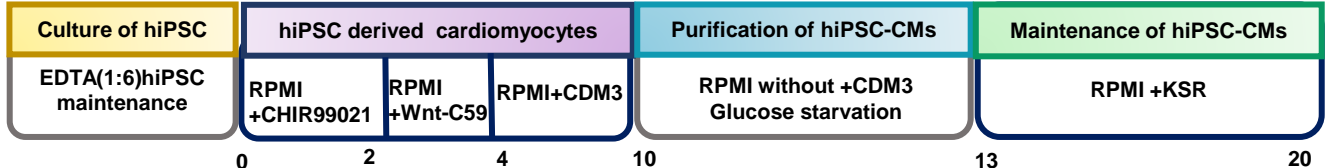

**B.**

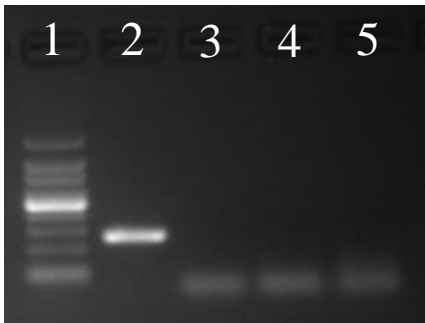

1.100bp ladder  
2.Positive control  
3.Negative control  
4.WT  
5.ADPRHL1<sup>-/-</sup>

**C.**

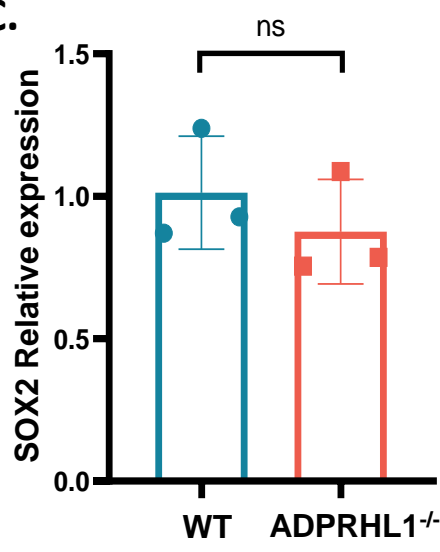

**D.**

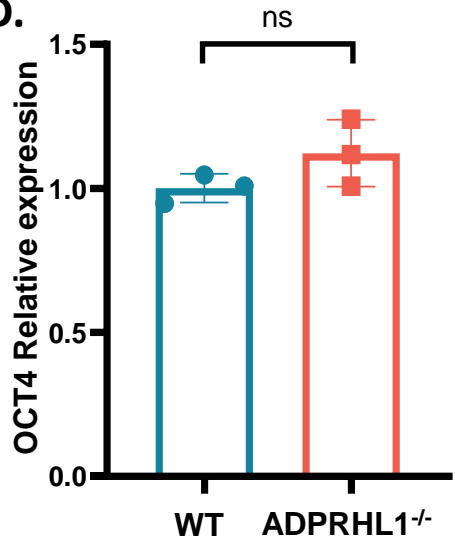

**E.**

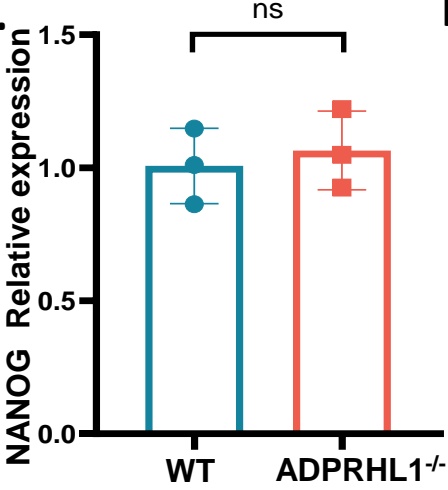

**F.**

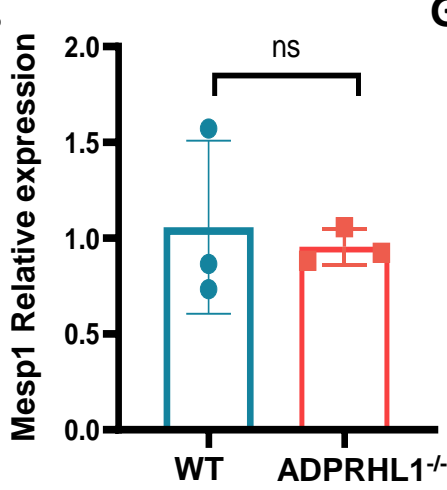

**G.**

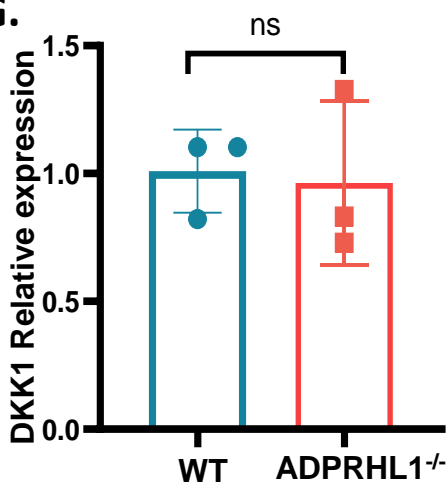

**H.**

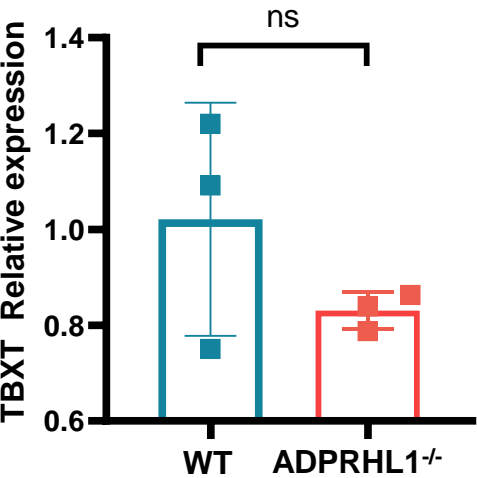

**I.**

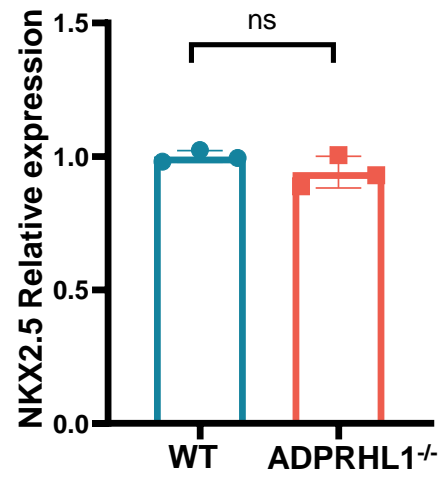

**J.**

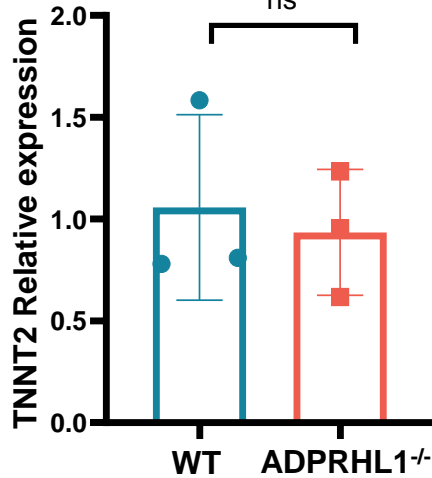

# Supplementary figure 2

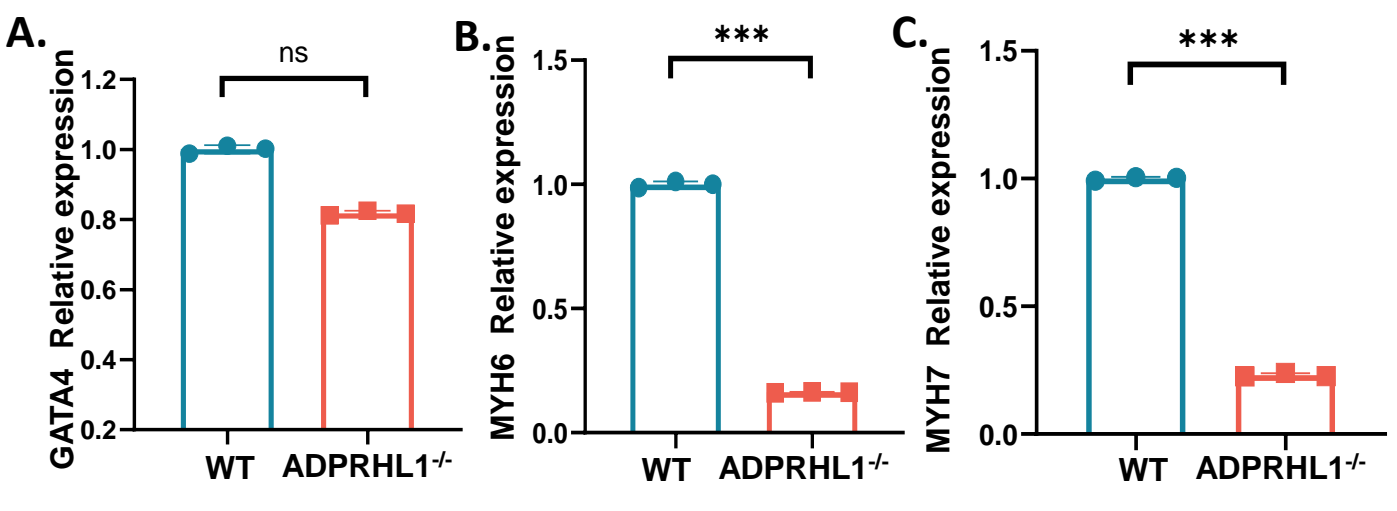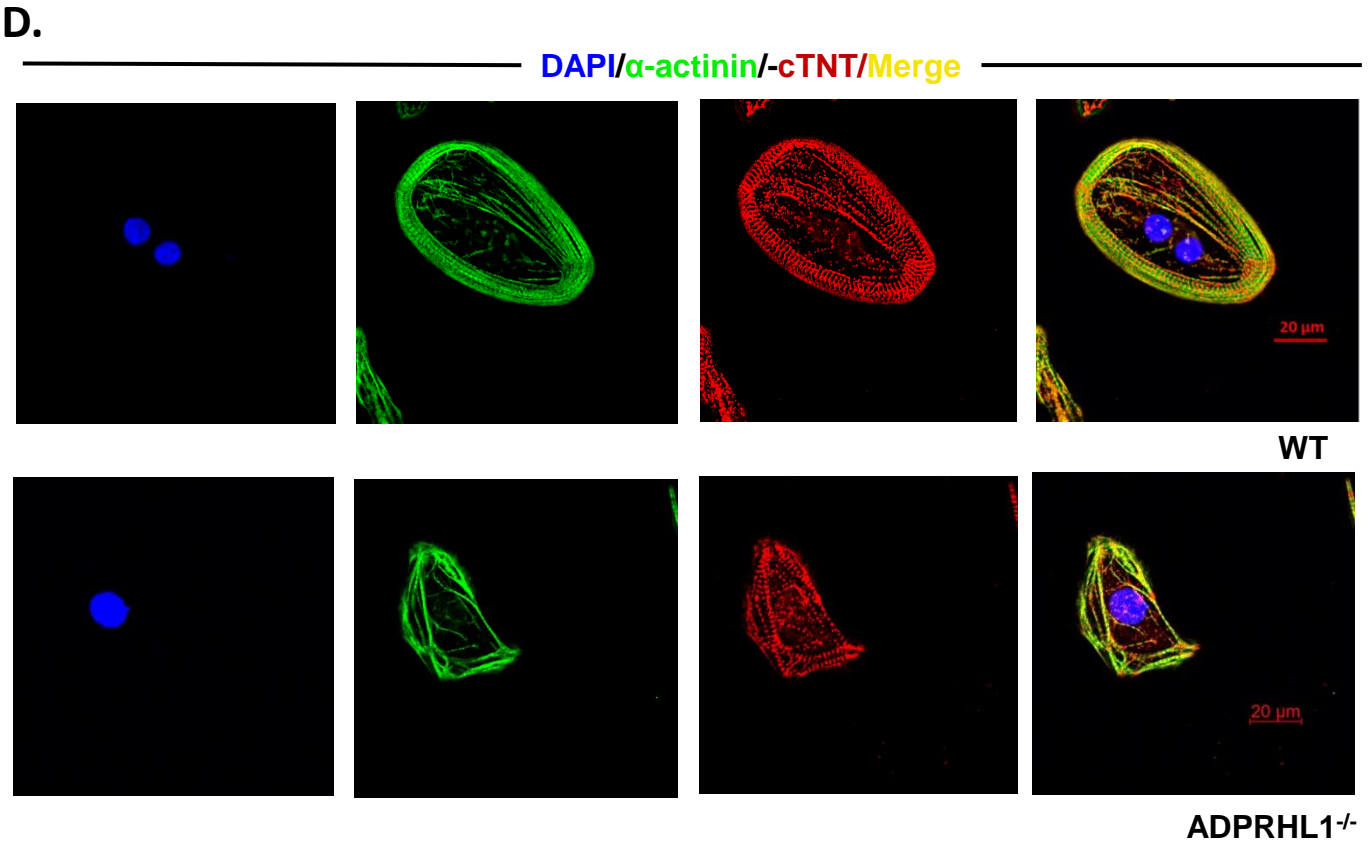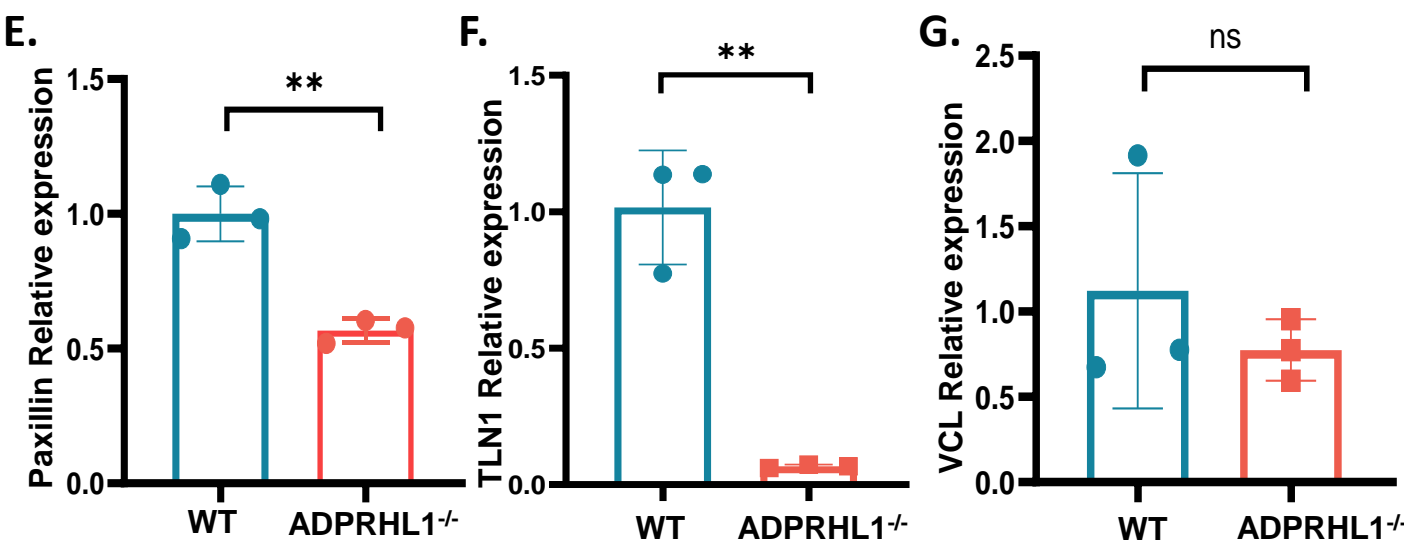

# Supplementary figure 3

A.

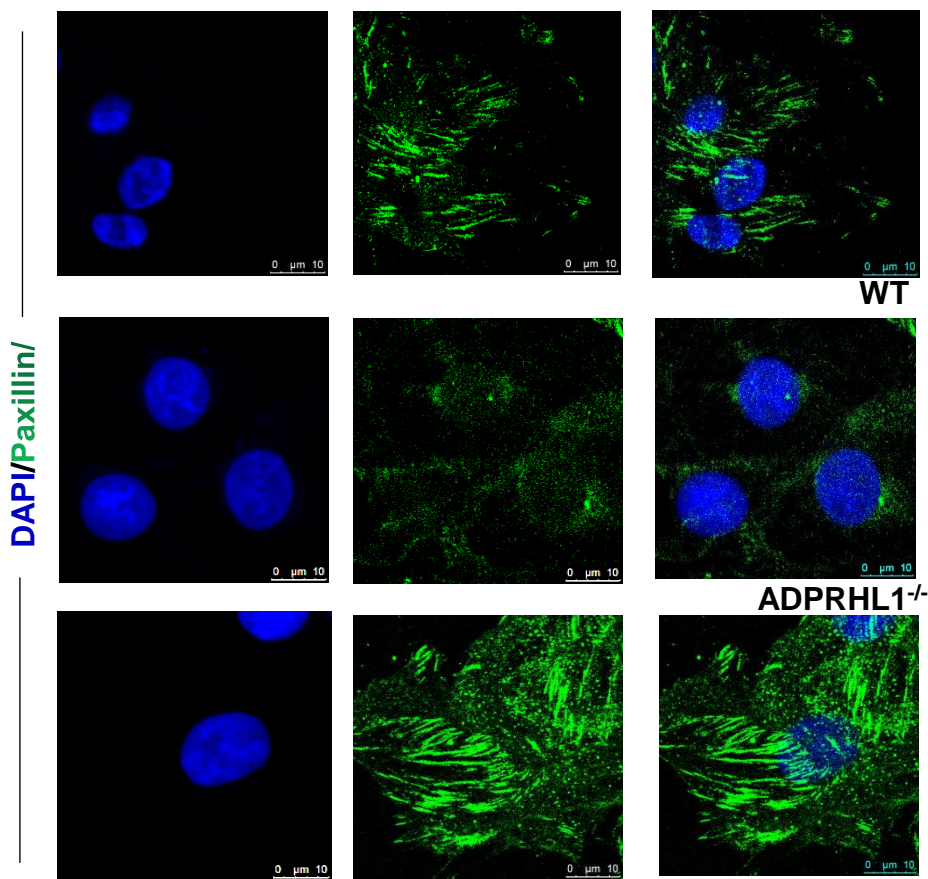

B.

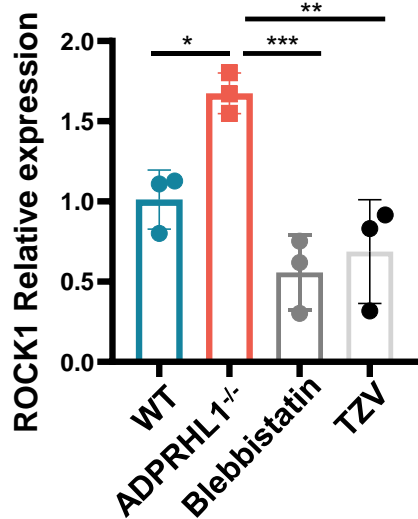

C.

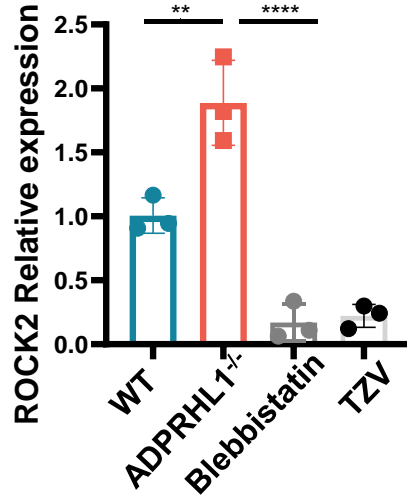

Blebbistatin

D.

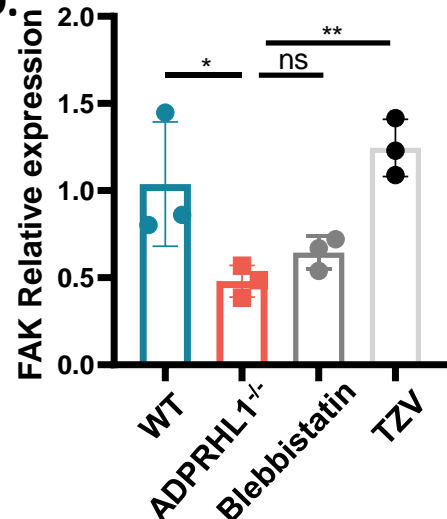

E.

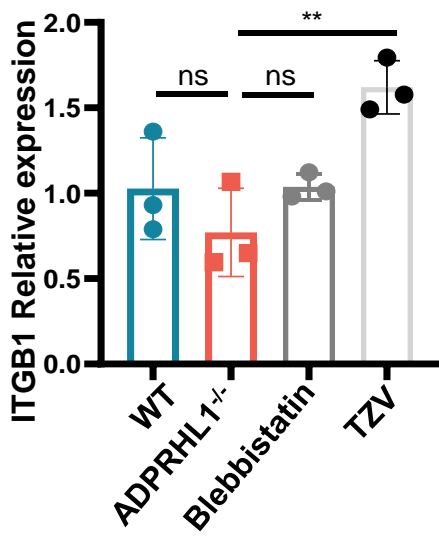

F.

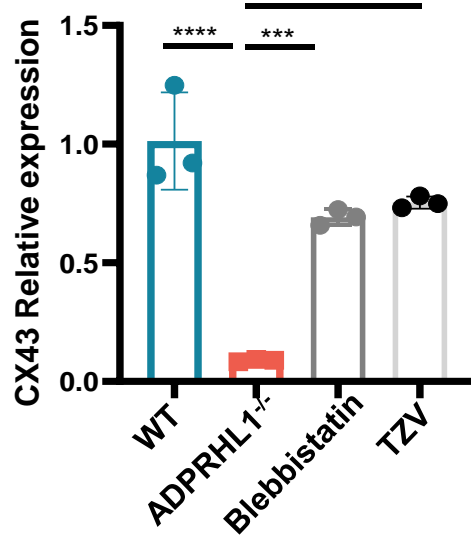

# Supplementary figure 4

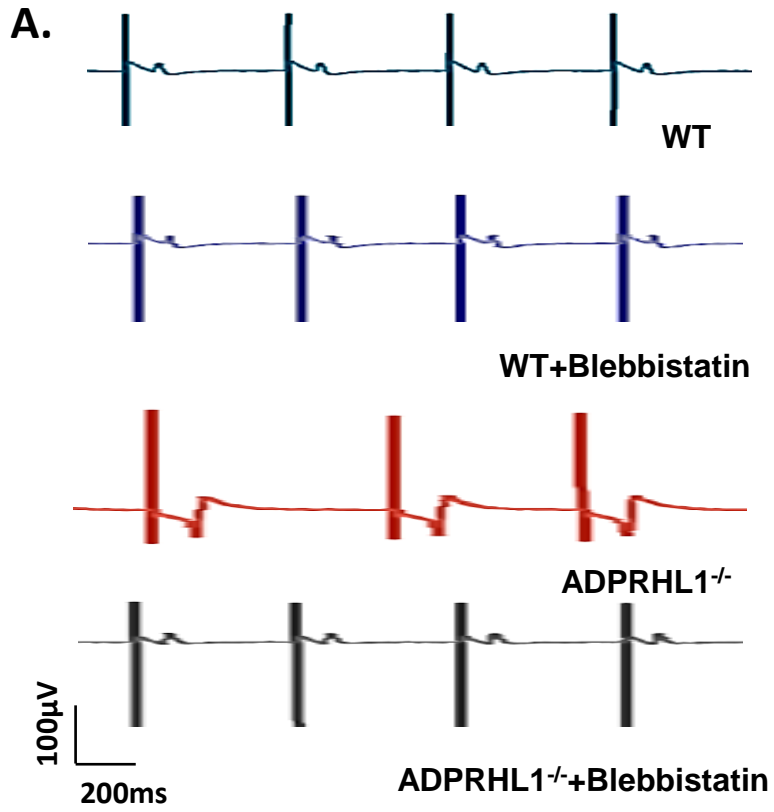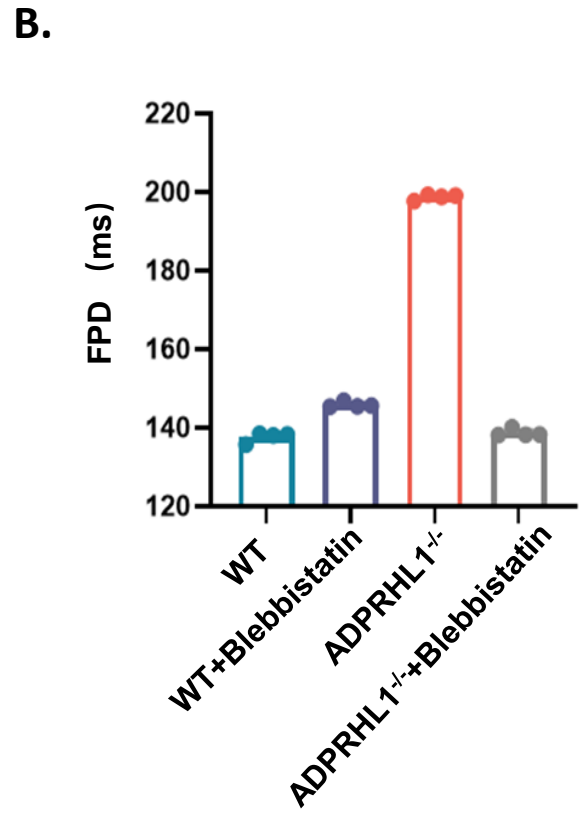

Supplement: 13287_2023_3507_MOESM1_ESM.pdf [file 13287_2023_3507_MOESM1_ESM.pdf]
